# Supplementary material for: Differential Disease Susceptibilities in Experimentally Reptarenavirus-Infected Boa Constrictors and Ball Pythons
Source: PubMed Central journal article supplement (PMC5651717; doi:10.1128/jvi.00451-17), 2017-07-12
Supplement: JVI.00451-17_zjv999182753s1.pdf [file JVI.00451-17_zjv999182753s1.pdf]

## **Supplemental Movie Legend**

**Supplemental Movie 1: Reptarenavirus-infected ball python displaying neurologic signs typical of inclusion body disease.** Uninfected ball pythons exhibiting normal behavior by recovering quickly after being placed on their backs.
